# Supplementary material for: A visible light mediated synergistic catalyst for effective inactivation of E. coli and degradation of azo dye Direct Red-22 with mechanism investigation
Source: Royal Society of Chemistry journal article supplement (doi:10.1039/c6ra16141c), 2016-01-01
Supplement: c6ra16141c1.pdf [file c6ra16141c1.pdf]

## Visible light mediated synergistic catalyst for effective inactivation of *E. coli* and degradation of azo dye Direct Red-22 with mechanism investigation

Saraschandra Naraginti, Yi Li \*, Yunbo Wu

Key Laboratory of Integrated Regulation and Resource Development on Shallow Lakes, Ministry of Education, College of Environment, Hohai University, Nanjing – 210098, PR China

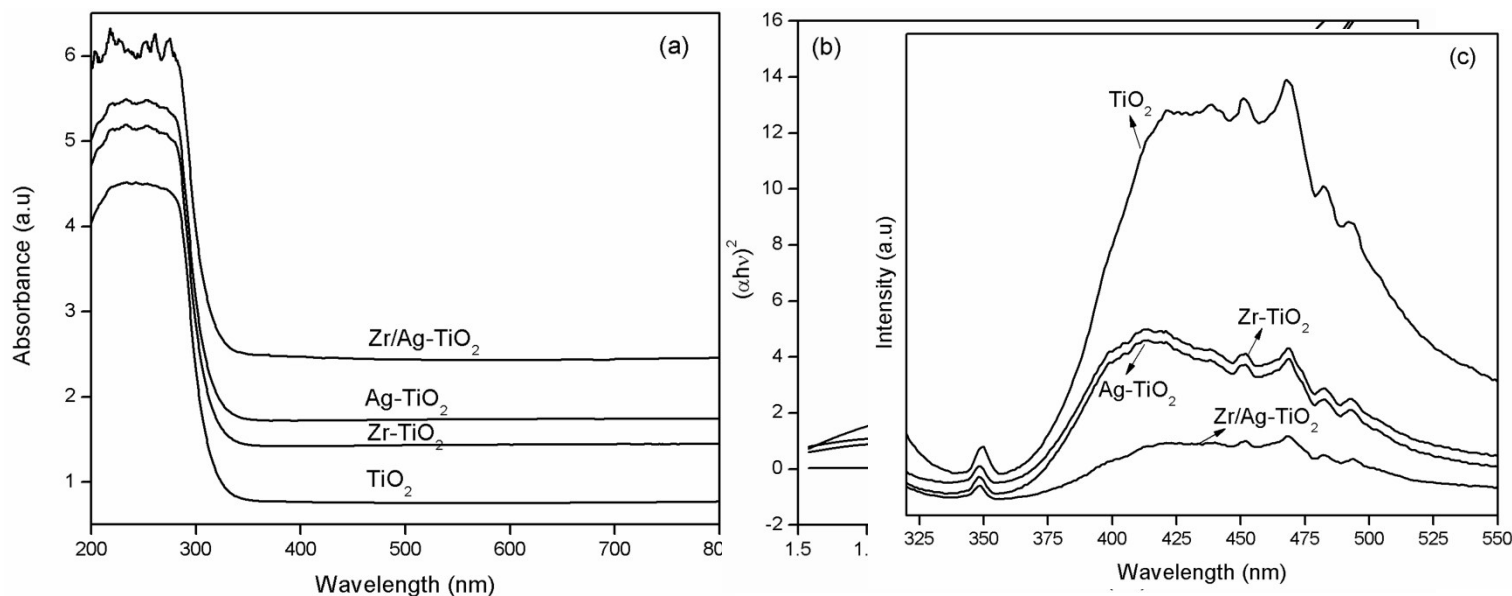

**Fig. S1:** (a) UV-Vis absorption spectra of nanoparticles and (b) optical energy gap ( $E_g$ ) and photoluminescence spectra (c) of the prepared nanoparticles

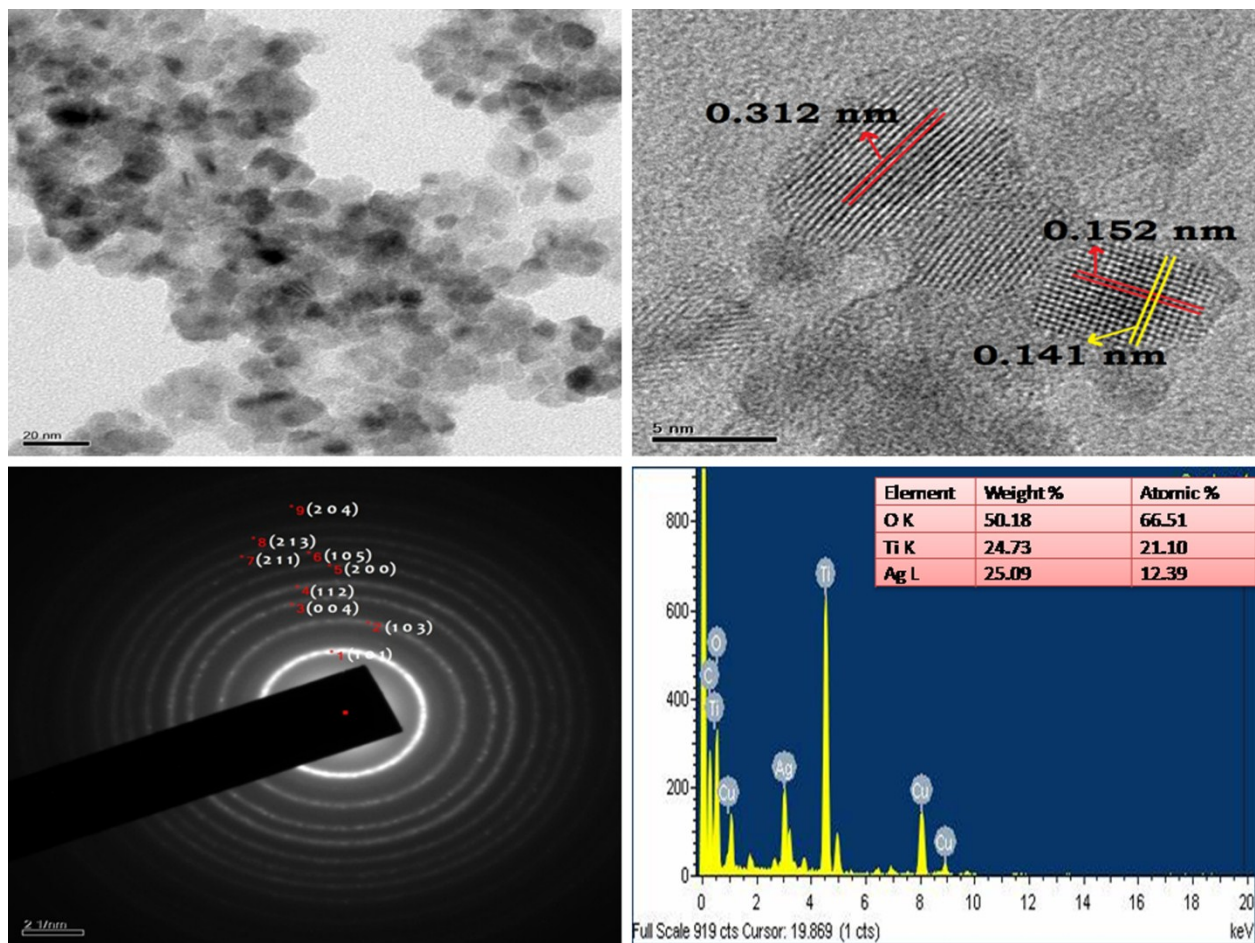

**Fig. S2:** TEM images of Ag-TiO<sub>2</sub> nanoparticles (a) and (b), selected area electron diffraction pattern of the doped nanoparticles (c), EDAX profile (d) showing the elements present in the doped nanoparticles

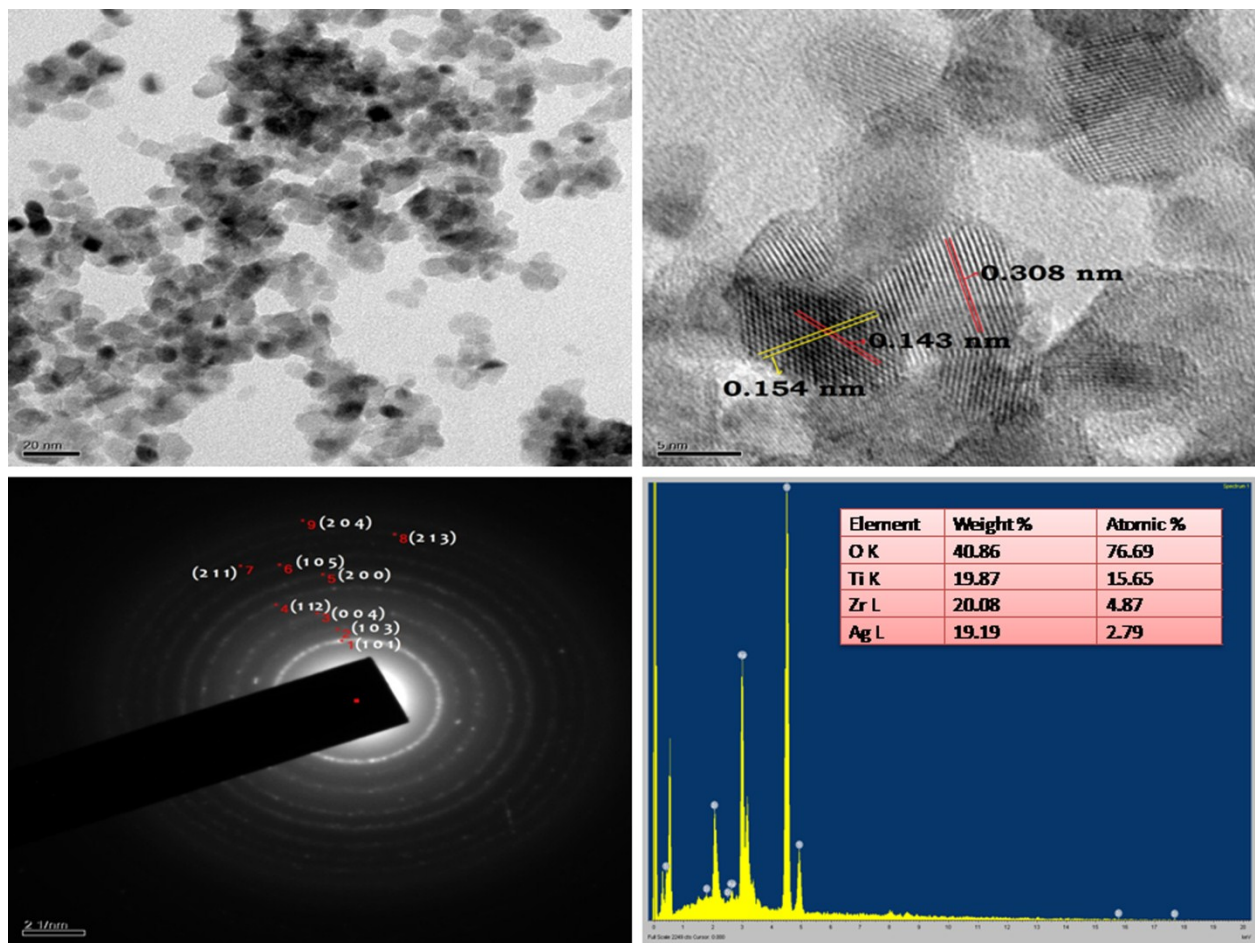

**Fig. S3:** TEM images of Zr/Ag co-doped TiO<sub>2</sub> nanoparticles (a) and (b), selected area electron diffraction pattern of the doped nanoparticles (c), EDAX profile (d) showing the elements present in the doped nanoparticles

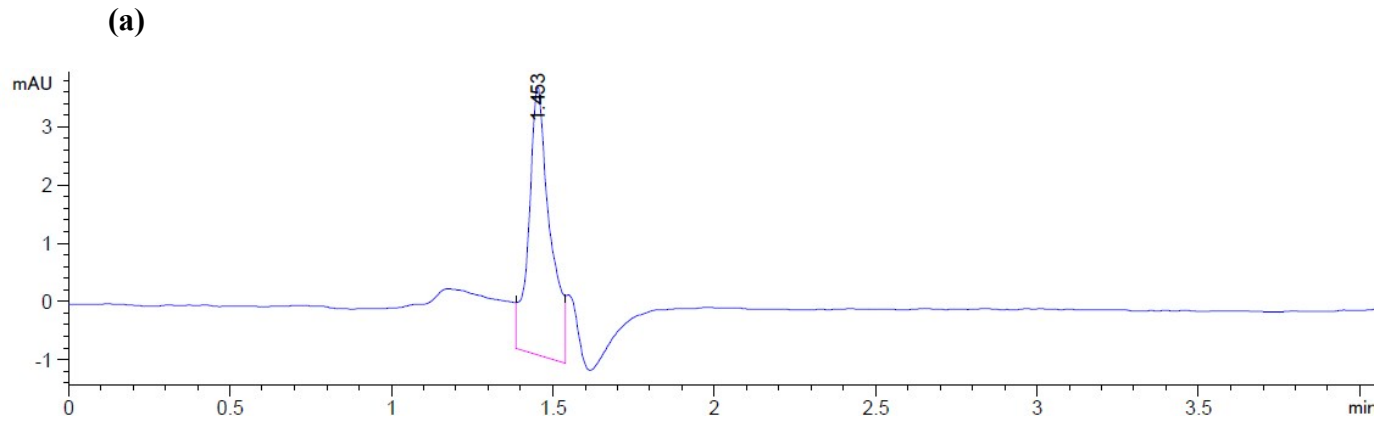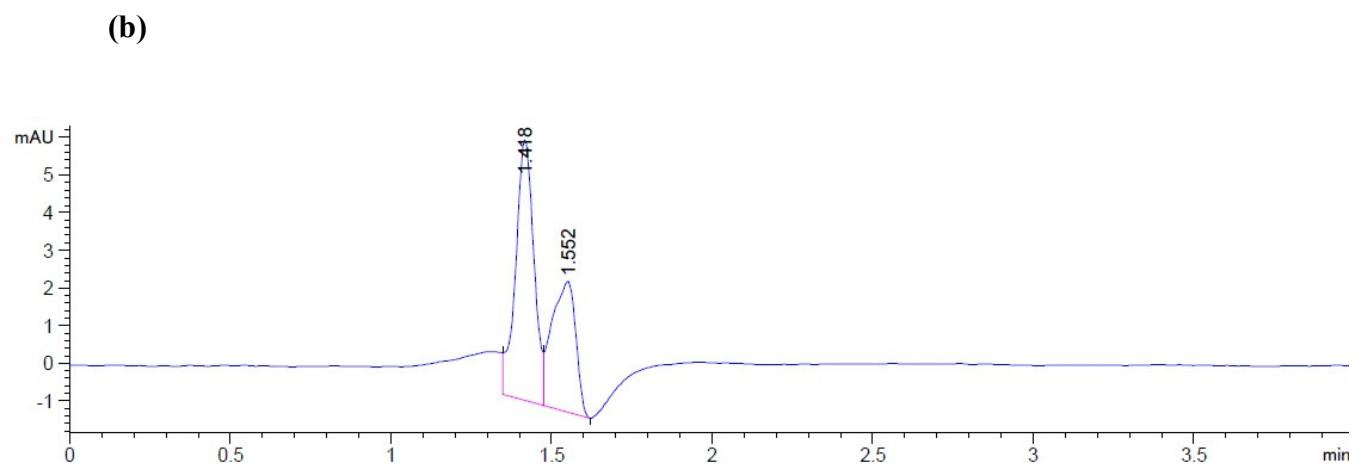

**Fig. S4:** HPLC chromatogram of DR-22 extracted at 0 h (a) and degraded metabolites extracted at 5 h (b).

**(a)**

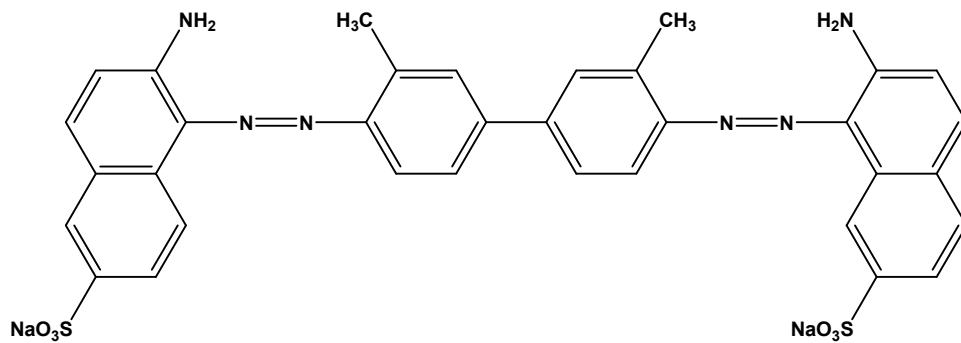

(b)

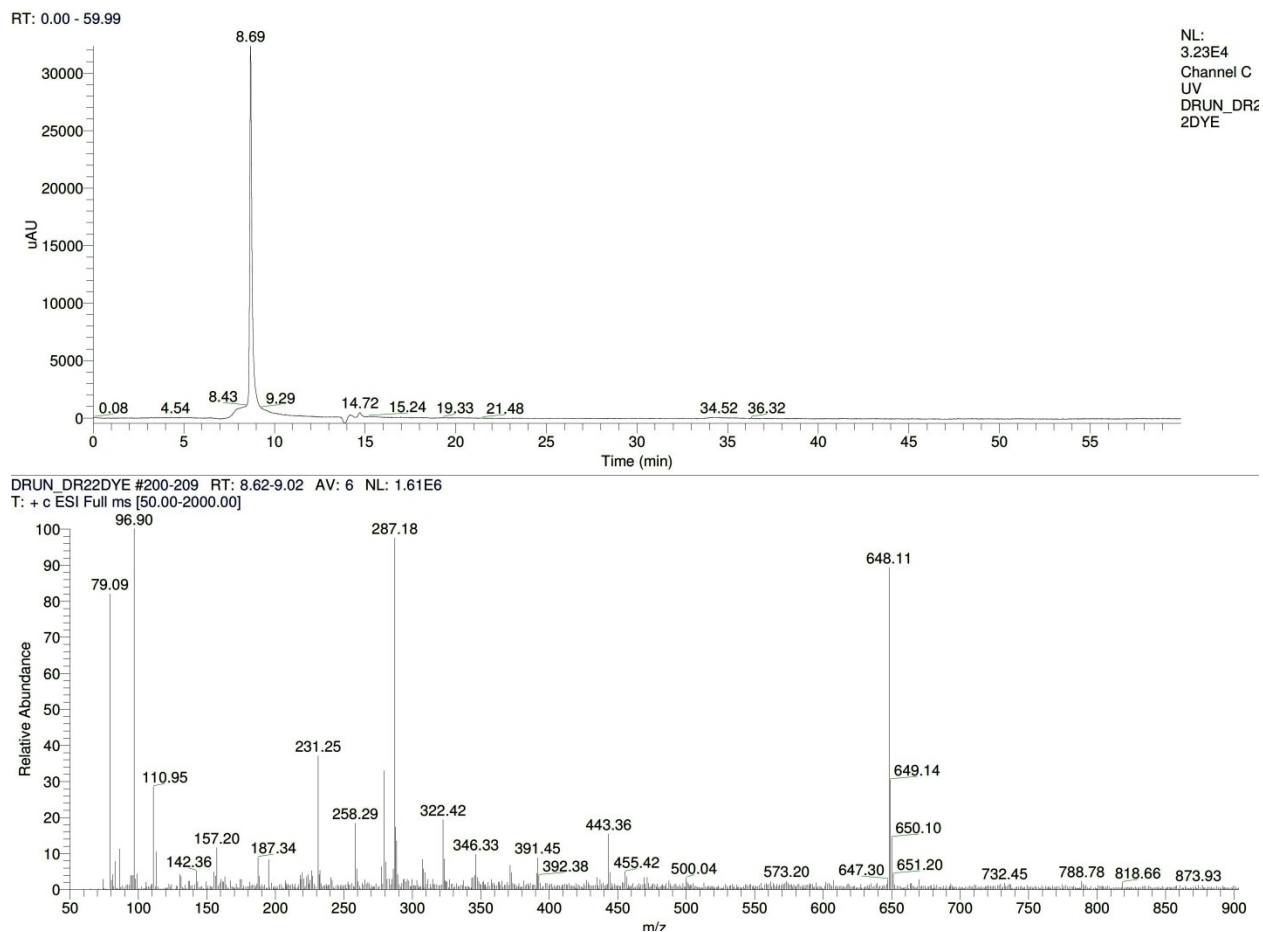

Fig. S5: Chemical structure of DR-22 (a) and LC-MS pattern (b) of the dye

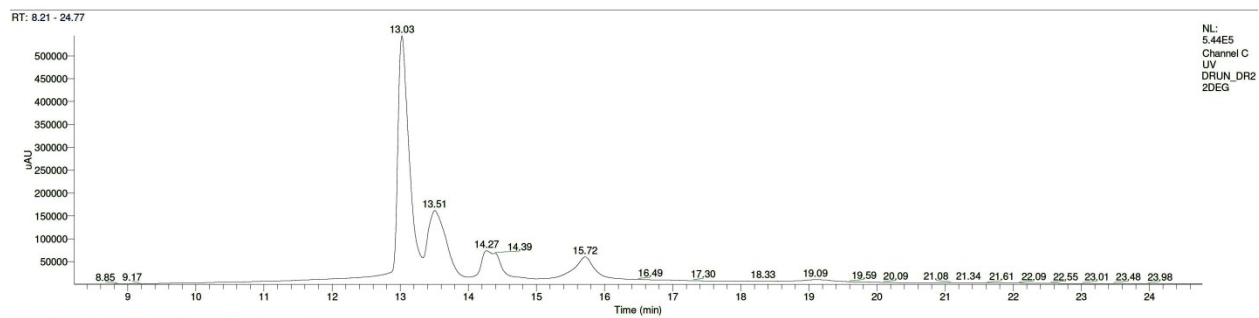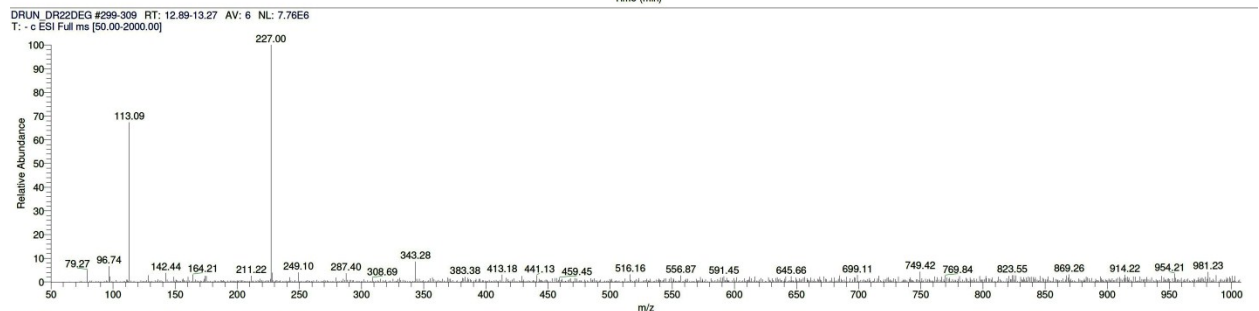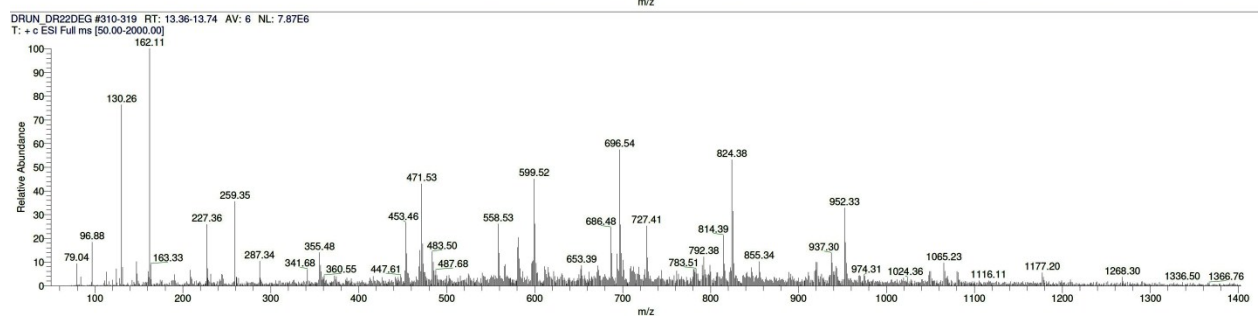

**Fig. S6:** LC-MS chromatogram and mass fragmentation pattern of degraded sample

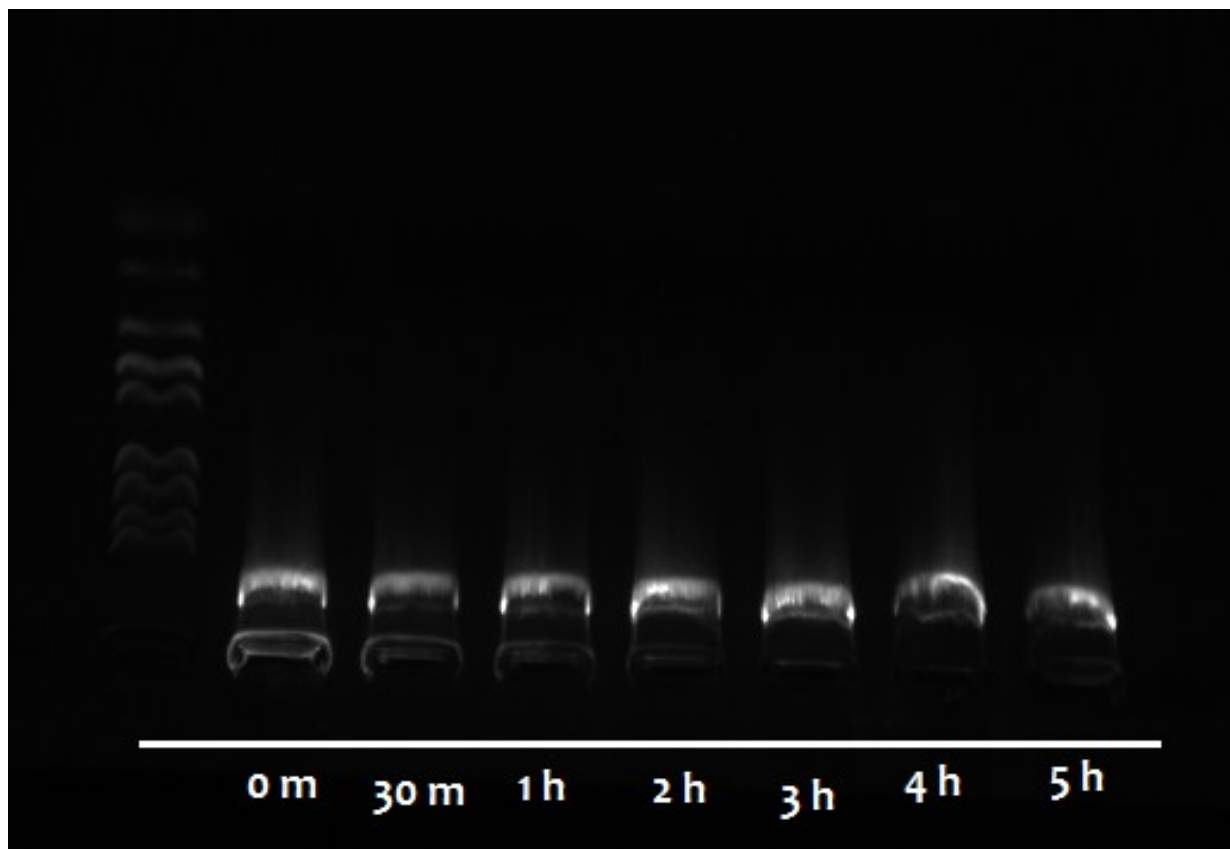

**Fig. S7:** Gel electrophoresis map of genomic DNA extracted from *E. coli* during visible light irradiation using Zr/Ag-TiO<sub>2</sub> nanoparticles
